# Supplementary material for: Phospholipase A2 as a point of care alternative to serum amylase and pancreatic lipase
Source: Royal Society of Chemistry journal article supplement (doi:10.1039/c6nr03376h), 2016-01-01
Supplement: c6nr03376h1.pdf [file c6nr03376h1.pdf]

## Phospholipase A2 as a point of care alternative to serum amylase and pancreatic lipase

Nathan J. Liu,<sup>1,3</sup> Robert Chapman,<sup>1</sup> Yiyang Lin,<sup>1</sup> Andrew Bentham,<sup>2</sup> Matthew Tyreman,<sup>2</sup> Natalie Philips,<sup>3</sup> Shahid A. Khan,<sup>3</sup> and Molly M. Stevens.<sup>1,\*</sup>

### SUPPORTING INFORMATION

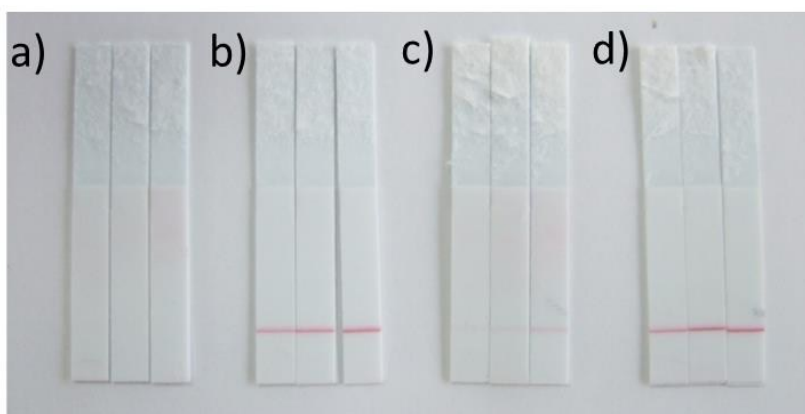

**Figure S1.** Images of LFD test strips prepared with BSA conjugated Fab 1BD2 (a-b) and BSA conjugated Fab 1BD1 (c-d) immobilised on the test line. Strips have been run with 0 ng/mL (a, c) and 100 ng/mL (b, d) PLA<sub>2</sub>-IB in the assay buffer HEPES (50 mM, 10 mg/mL BSA), and BSA conjugated Fab 1BC1 AuNPs prepared in 20 mM TAPS pH 8.5 (left strips), 20 mM Borate pH 8.5 (middle strips) and 20 mM Borate pH 9.5 (right strips). Non-specific binding is clearly visible on the 1BD1 test lines (c), but not on the 1BD2 test lines (a).

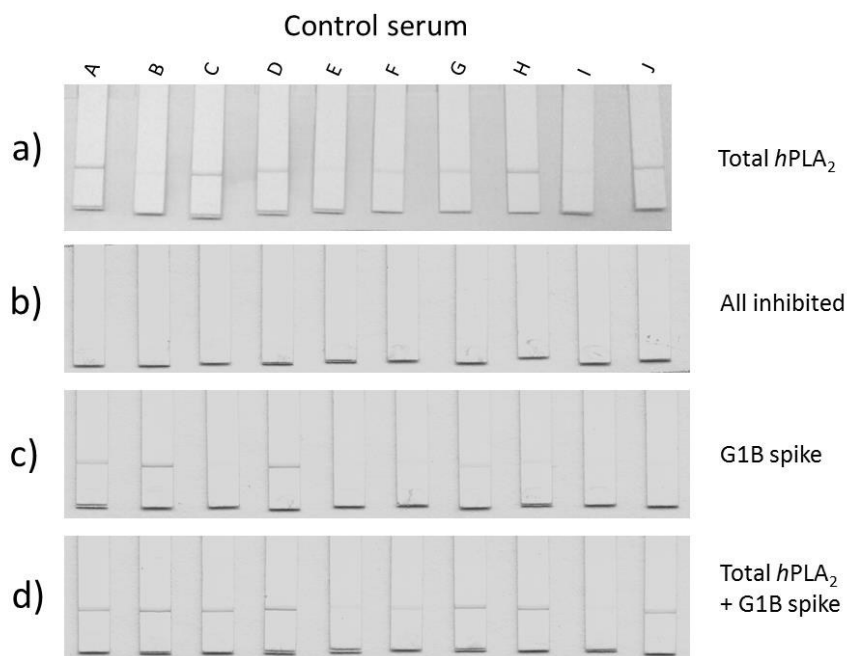

**Figure S2.** Images of LFD strips after running the activity assay on a range of 10 healthy serum samples. a) Signal without any inhibition of the enzyme. b) Signal after inhibition of sPLA<sub>2</sub>-IIA with 10  $\mu$ M LY315920, c) Signal after inhibition of sPLA<sub>2</sub>-IIA with 10  $\mu$ M LY315920 and addition of a 5 nM PLA<sub>2</sub>-IB spike, and d) Signal without inhibitor but with the addition of a 5 nM PLA<sub>2</sub>-IB spike. In cases where the total PLA<sub>2</sub> activity is low, the PLA<sub>2</sub>-IB spike can be seen to have a variable effect on the signal generation.

**Table S1.** Spearman and Pearson correlation coefficients between the biomarkers measured

|                              | n   | Amylase :<br>Lipase | Amylase :<br>[sPLA <sub>2</sub> -IB] | Lipase :<br>[sPLA <sub>2</sub> -IB] | sPLA <sub>2</sub> -IB<br>(concentration :<br>activity) | sPLA <sub>2</sub> -IB<br>concentration<br>(ELISA : LFD) |
|------------------------------|-----|---------------------|--------------------------------------|-------------------------------------|--------------------------------------------------------|---------------------------------------------------------|
| <b>ρ (Spearman)</b>          |     |                     |                                      |                                     |                                                        |                                                         |
| All samples                  | 153 | 0.744               | 0.677                                | 0.684                               | 0.357                                                  | 0.962                                                   |
| All Clinical and controls    | 118 | 0.728               | 0.702                                | 0.755                               | 0.477                                                  | 0.960                                                   |
| Unique clinical and controls | 86  | 0.785               | 0.738                                | 0.763                               | 0.553                                                  | 0.949                                                   |
| <b>ρ (Pearson)</b>           |     |                     |                                      |                                     |                                                        |                                                         |
| All samples                  | 153 | 0.629               | 0.555                                | 0.448                               | 0.575                                                  | 0.872                                                   |
| All Clinical and controls    | 118 | 0.633               | 0.575                                | 0.535                               | 0.621                                                  | 0.869                                                   |
| Unique clinical and controls | 86  | 0.711               | 0.738                                | 0.661                               | 0.713                                                  | 0.813                                                   |

**Table S2.** Welch's one way analysis of variance (ANOVA) tables for the biomarkers measured (all clinical samples, n=118)

| <b>AMYLASE</b> | Pancreatitis | Disease ctrl. | Healthy ctrl. |
|----------------|--------------|---------------|---------------|
| Pancreatitis   | 1            | 0.203         | 0.003         |
| Disease ctrl.  | 0.203        | 1             | <0.001        |
| Healthy ctrl.  | 0.003        | <0.001        | 1             |

| <b>LIPASE</b> | Pancreatitis | Disease ctrl. | Healthy ctrl. |
|---------------|--------------|---------------|---------------|
| Pancreatitis  | 1            | 0.009         | <0.001        |
| Disease ctrl. | 0.009        | 1             | <0.001        |
| Healthy ctrl. | <0.001       | <0.001        | 1             |

| <b>[sPLA<sub>2</sub>-IB]<br/>(ELISA)</b> | Pancreatitis | Disease ctrl. | Healthy ctrl. |
|------------------------------------------|--------------|---------------|---------------|
| Pancreatitis                             | 1            | 0.051         | 0.001         |
| Disease ctrl.                            | 0.051        | 1             | <0.001        |
| Healthy ctrl.                            | 0.001        | <0.001        | 1             |

| <b>[sPLA<sub>2</sub>-IB]<br/>(LFD)</b> | Pancreatitis | Disease ctrl. | Healthy ctrl. |
|----------------------------------------|--------------|---------------|---------------|
| Pancreatitis                           | 1            | 0.024         | 0.001         |
| Disease ctrl.                          | 0.024        | 1             | <0.001        |
| Healthy ctrl.                          | 0.001        | <0.001        | 1             |

| <b>sPLA<sub>2</sub>-IB<br/>Activity</b> | Pancreatitis | Disease ctrl. | Healthy ctrl. |
|-----------------------------------------|--------------|---------------|---------------|
| Pancreatitis                            | 1            | 0.380         | 0.014         |
| Disease ctrl.                           | 0.380        | 1             | <0.001        |
| Healthy ctrl.                           | 0.014        | <0.001        | 1             |

**Table S3.** Welch's one way analysis of variance (ANOVA) tables for the biomarkers measured (first sample from each unique patient n=86)

| <b>AMYLASE</b> | Pancreatitis | Disease ctrl. | Healthy ctrl. |
|----------------|--------------|---------------|---------------|
| Pancreatitis   | 1            | 0.317         | 0.039         |
| Disease ctrl.  | 0.317        | 1             | <0.001        |
| Healthy ctrl.  | 0.039        | <0.001        | 1             |

| <b>LIPASE</b> | Pancreatitis | Disease ctrl. | Healthy ctrl. |
|---------------|--------------|---------------|---------------|
| Pancreatitis  | 1            | 0.146         | 0.005         |
| Disease ctrl. | 0.146        | 1             | <0.001        |
| Healthy ctrl. | 0.005        | <0.001        | 1             |

| <b>[sPLA<sub>2</sub>-IB]<br/>(ELISA)</b> | Pancreatitis | Disease ctrl. | Healthy ctrl. |
|------------------------------------------|--------------|---------------|---------------|
| Pancreatitis                             | 1            | 0.111         | 0.012         |
| Disease ctrl.                            | 0.111        | 1             | <0.001        |
| Healthy ctrl.                            | 0.012        | <0.001        | 1             |

| <b>[sPLA<sub>2</sub>-IB]<br/>(LFD)</b> | Pancreatitis | Disease ctrl. | Healthy ctrl. |
|----------------------------------------|--------------|---------------|---------------|
| Pancreatitis                           | 1            | 0.093         | 0.027         |
| Disease ctrl.                          | 0.093        | 1             | <0.001        |
| Healthy ctrl.                          | 0.027        | <0.001        | 1             |

| <b>sPLA<sub>2</sub>-IB<br/>Activity</b> | Pancreatitis | Disease ctrl. | Healthy ctrl. |
|-----------------------------------------|--------------|---------------|---------------|
| Pancreatitis                            | 1            | 0.267         | 0.056         |
| Disease ctrl.                           | 0.267        | 1             | 0.002         |
| Healthy ctrl.                           | 0.056        | 0.002         | 1             |

**Table S4.** ROC characteristics (Pancreatitis vs disease controls)

|                                     | <b>AUC</b> | <b>Threshold</b> | <b>Sensitivity</b> | <b>Specificity</b> |
|-------------------------------------|------------|------------------|--------------------|--------------------|
| <b>Amylase</b>                      | 0.607      | 693              | 0.588              | 0.617              |
| <b>Lipase</b>                       | 0.704      | 562              | 0.882              | 0.605              |
| <b>sPLA<sub>2</sub>-IB (ELISA)</b>  | 0.685      | 32               | 0.765              | 0.580              |
| <b>sPLA<sub>2</sub>-IB (LFD)</b>    | 0.719      | 43               | 0.765              | 0.630              |
| <b>sPLA<sub>2</sub>-IB activity</b> | 0.485      | 1460             | 0.529              | 0.605              |

**Table S5.** ROC characteristics (Pancreatitis vs healthy controls)

|                                     | <b>AUC</b> | <b>Threshold</b> | <b>Sensitivity</b> | <b>Specificity</b> |
|-------------------------------------|------------|------------------|--------------------|--------------------|
| <b>Amylase</b>                      | 0.909      | 410              | 0.882              | 0.950              |
| <b>Lipase</b>                       | 0.947      | 396              | 0.941              | 1.000              |
| <b>sPLA<sub>2</sub>-IB (ELISA)</b>  | 0.913      | 18               | 0.882              | 1.000              |
| <b>sPLA<sub>2</sub>-IB (LFD)</b>    | 0.928      | 21               | 0.882              | 1.000              |
| <b>sPLA<sub>2</sub>-IB activity</b> | 0.721      | 1360             | 0.765              | 0.600              |

**Table S6.** ROC characteristics (Pancreatitis vs disease controls) for unique patients only

|                                     | <b>AUC</b> | <b>Threshold</b> | <b>Sensitivity</b> | <b>Specificity</b> |
|-------------------------------------|------------|------------------|--------------------|--------------------|
| <b>Amylase</b>                      | 0.642      | 685              | 0.625              | 0.655              |
| <b>Lipase</b>                       | 0.692      | 562              | 0.875              | 0.690              |
| <b>sPLA<sub>2</sub>-IB (ELISA)</b>  | 0.684      | 49               | 0.750              | 0.707              |
| <b>sPLA<sub>2</sub>-IB (LFD)</b>    | 0.734      | 78               | 0.750              | 0.845              |
| <b>sPLA<sub>2</sub>-IB activity</b> | 0.588      | 2050             | 0.500              | 0.776              |

**Table S7.** ROC characteristics (Pancreatitis vs healthy controls) for unique patients only

|                                     | <b>AUC</b> | <b>Threshold</b> | <b>Sensitivity</b> | <b>Specificity</b> |
|-------------------------------------|------------|------------------|--------------------|--------------------|
| <b>Amylase</b>                      | 0.944      | 410              | 0.875              | 0.950              |
| <b>Lipase</b>                       | 0.888      | 430              | 0.875              | 1.000              |
| <b>sPLA<sub>2</sub>-IB (ELISA)</b>  | 0.816      | 33               | 0.875              | 1.000              |
| <b>sPLA<sub>2</sub>-IB (LFD)</b>    | 0.847      | 50               | 0.750              | 1.000              |
| <b>sPLA<sub>2</sub>-IB activity</b> | 0.806      | 1360             | 0.875              | 0.600              |
